# Supplementary material
Source: Springer Nature journal article supplement (https://www.springermedizin.de/resource/supplementary/13063_2012_1268_MOESM2_ESM.pdf/9620530)

| IDMC Meeting | Relative risk (95% CI) | Events, bolus | Events, no_bolus |
|--------------|------------------------|---------------|------------------|
|--------------|------------------------|---------------|------------------|

|                        |                   |        |        |
|------------------------|-------------------|--------|--------|
| 18th June 2009 (n=406) | 0.70 (0.40, 1.24) | 26/273 | 18/133 |
|------------------------|-------------------|--------|--------|

|                           |                   |        |        |
|---------------------------|-------------------|--------|--------|
| 12th October 2009 (n=844) | 0.92 (0.61, 1.39) | 58/565 | 31/279 |
|---------------------------|-------------------|--------|--------|

|                            |                   |        |        |
|----------------------------|-------------------|--------|--------|
| 26th January 2010 (n=1337) | 1.13 (0.80, 1.58) | 96/889 | 43/448 |
|----------------------------|-------------------|--------|--------|

|                         |                   |          |        |
|-------------------------|-------------------|----------|--------|
| 26th July 2010 (n=2196) | 1.32 (0.98, 1.77) | 148/1465 | 56/731 |
|-------------------------|-------------------|----------|--------|

|                            |                   |          |        |
|----------------------------|-------------------|----------|--------|
| 12th January 2011 (n=2987) | 1.46 (1.13, 1.90) | 202/1978 | 69/989 |
|----------------------------|-------------------|----------|--------|

.4 .6 .8 1 1.2 1.6 2

bolus reduces risk

bolus increases risk

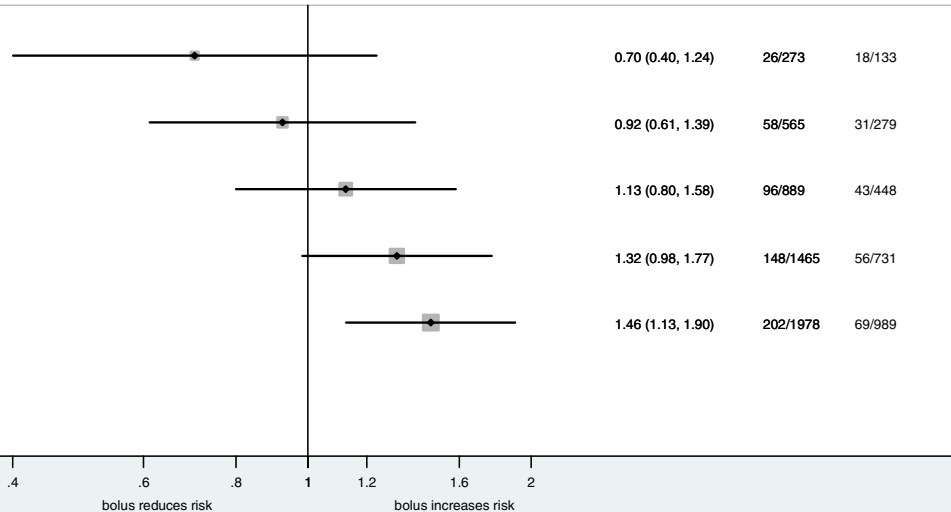

Supplement: MOESM2 [file 9620530]
